# Supplementary material for: In vitro culture of freshly isolated Trypanosoma brucei brucei bloodstream forms results in gene copy-number changes
Source: PubMed Central journal article supplement (PMC8459984; doi:10.1371/journal.pntd.0009738), 2021-09-13

**A.** PAD1 staining of MAK65 from rat B

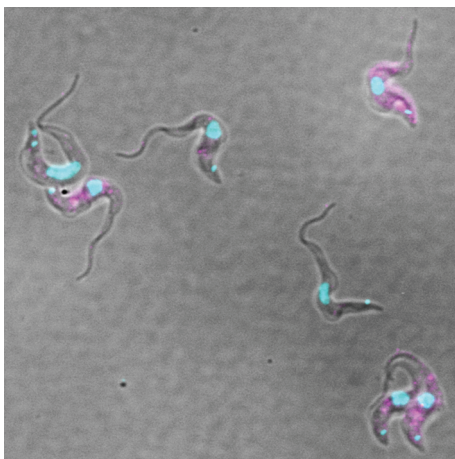

**B.** Stumpy-form differentiation *in vitro* vs *in vivo*

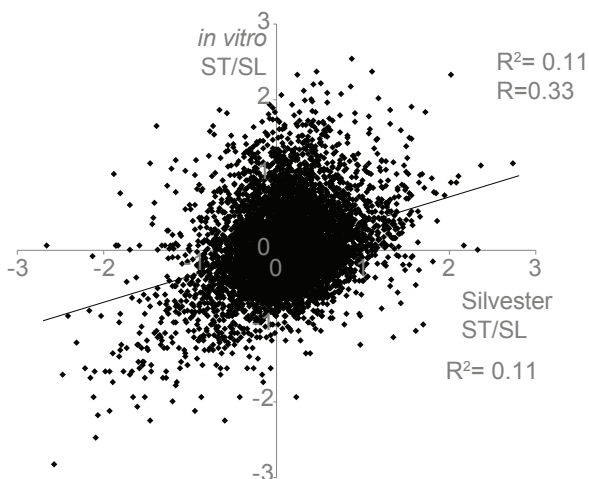

**C.** Poly(A) selection depletes long mRNAs

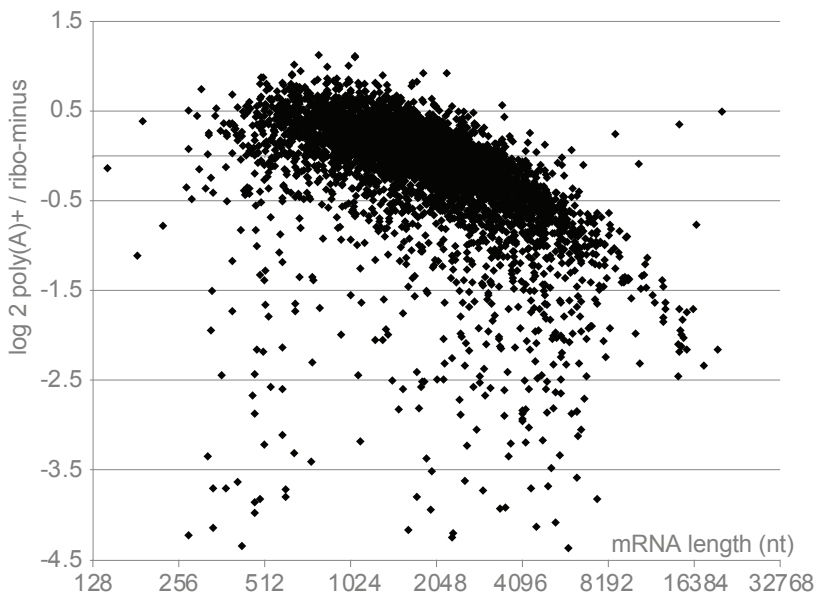

Supplement: pntd.0009738.s002.pdf [file pntd.0009738.s002.pdf]
