# Supplementary material for: In vitro culture of freshly isolated Trypanosoma brucei brucei bloodstream forms results in gene copy-number changes
Source: PubMed Central journal article supplement (PMC8459984; doi:10.1371/journal.pntd.0009738), 2021-09-13

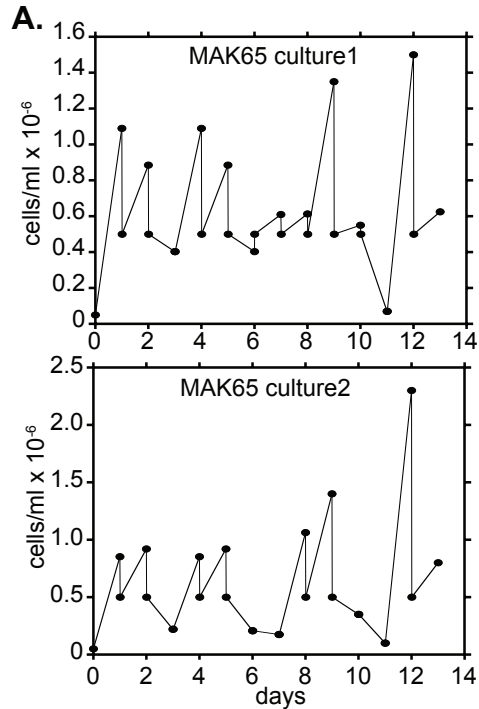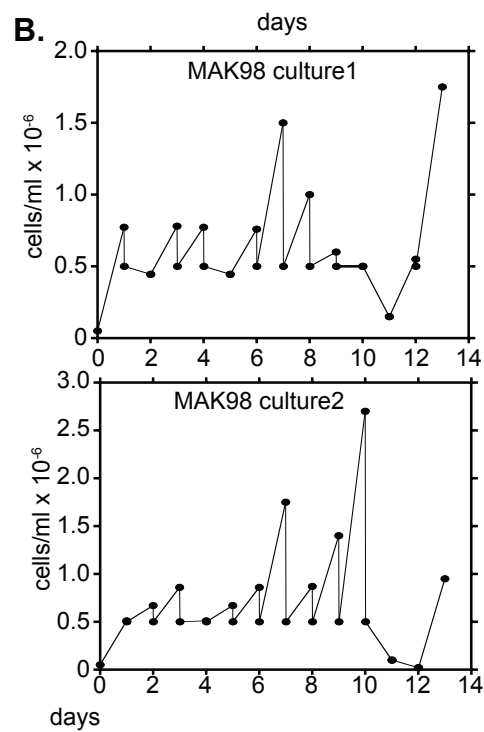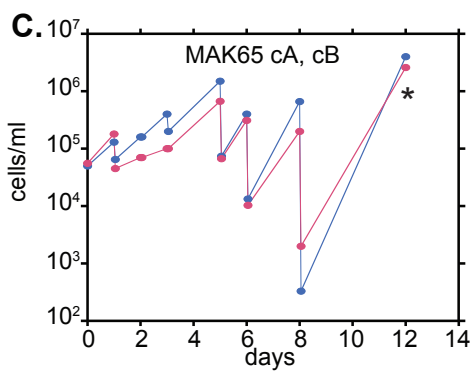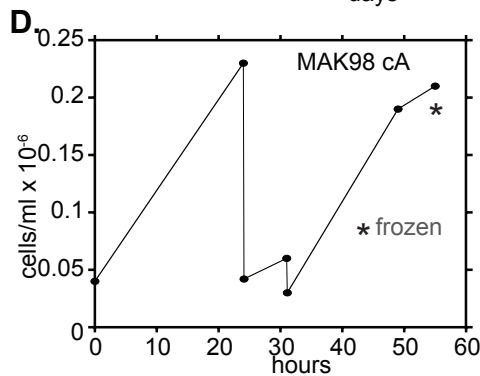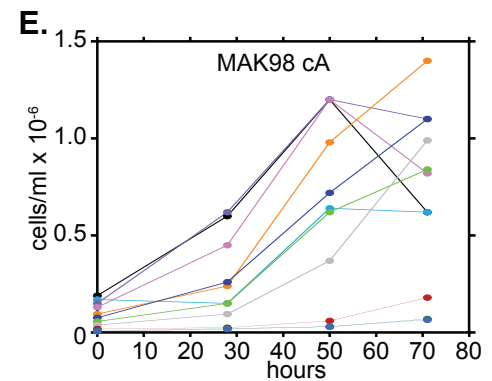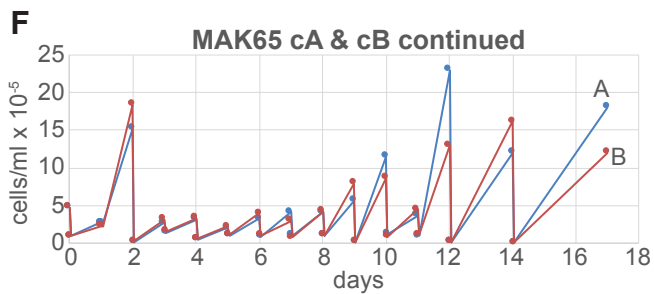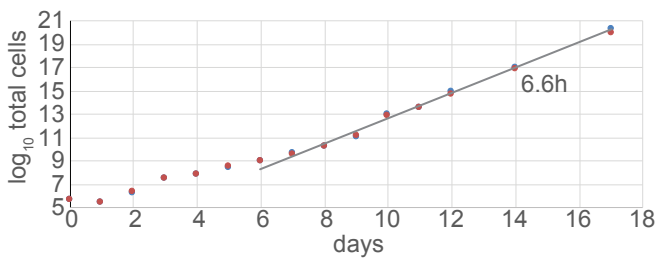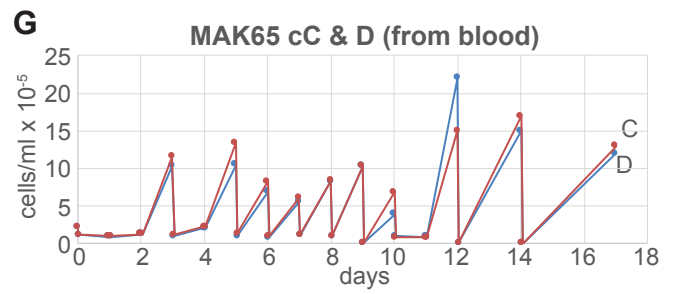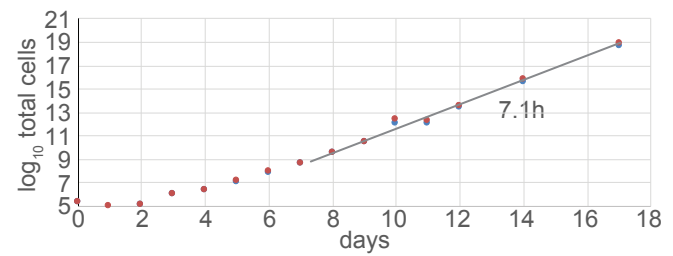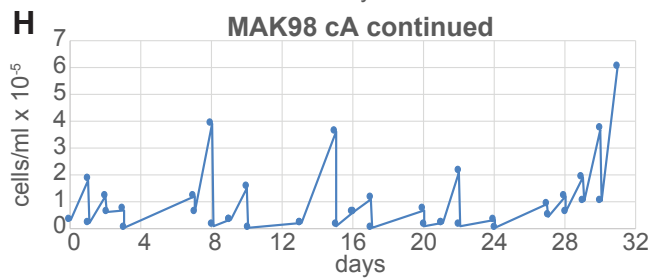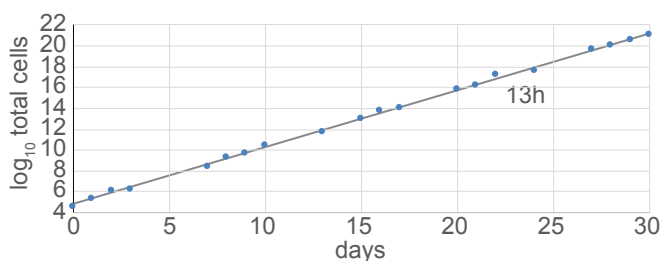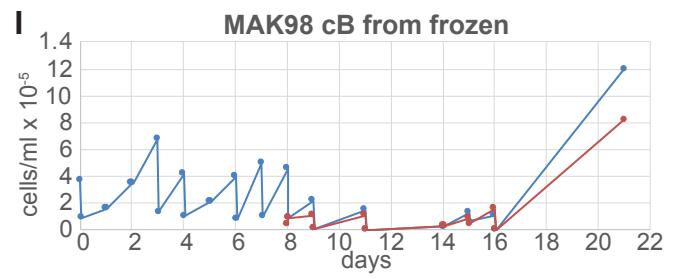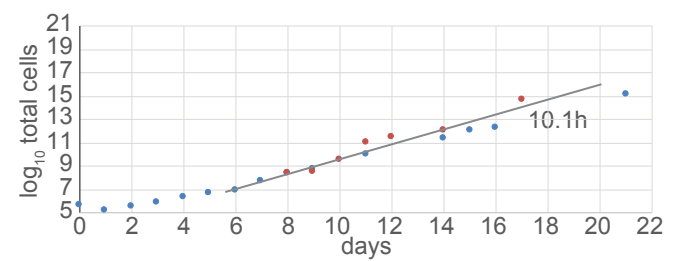

Supplement: pntd.0009738.s003.pdf [file pntd.0009738.s003.pdf]
