# Supplementary material for: In vitro culture of freshly isolated Trypanosoma brucei brucei bloodstream forms results in gene copy-number changes
Source: PubMed Central journal article supplement (PMC8459984; doi:10.1371/journal.pntd.0009738), 2021-09-13

# MAK65 starting population

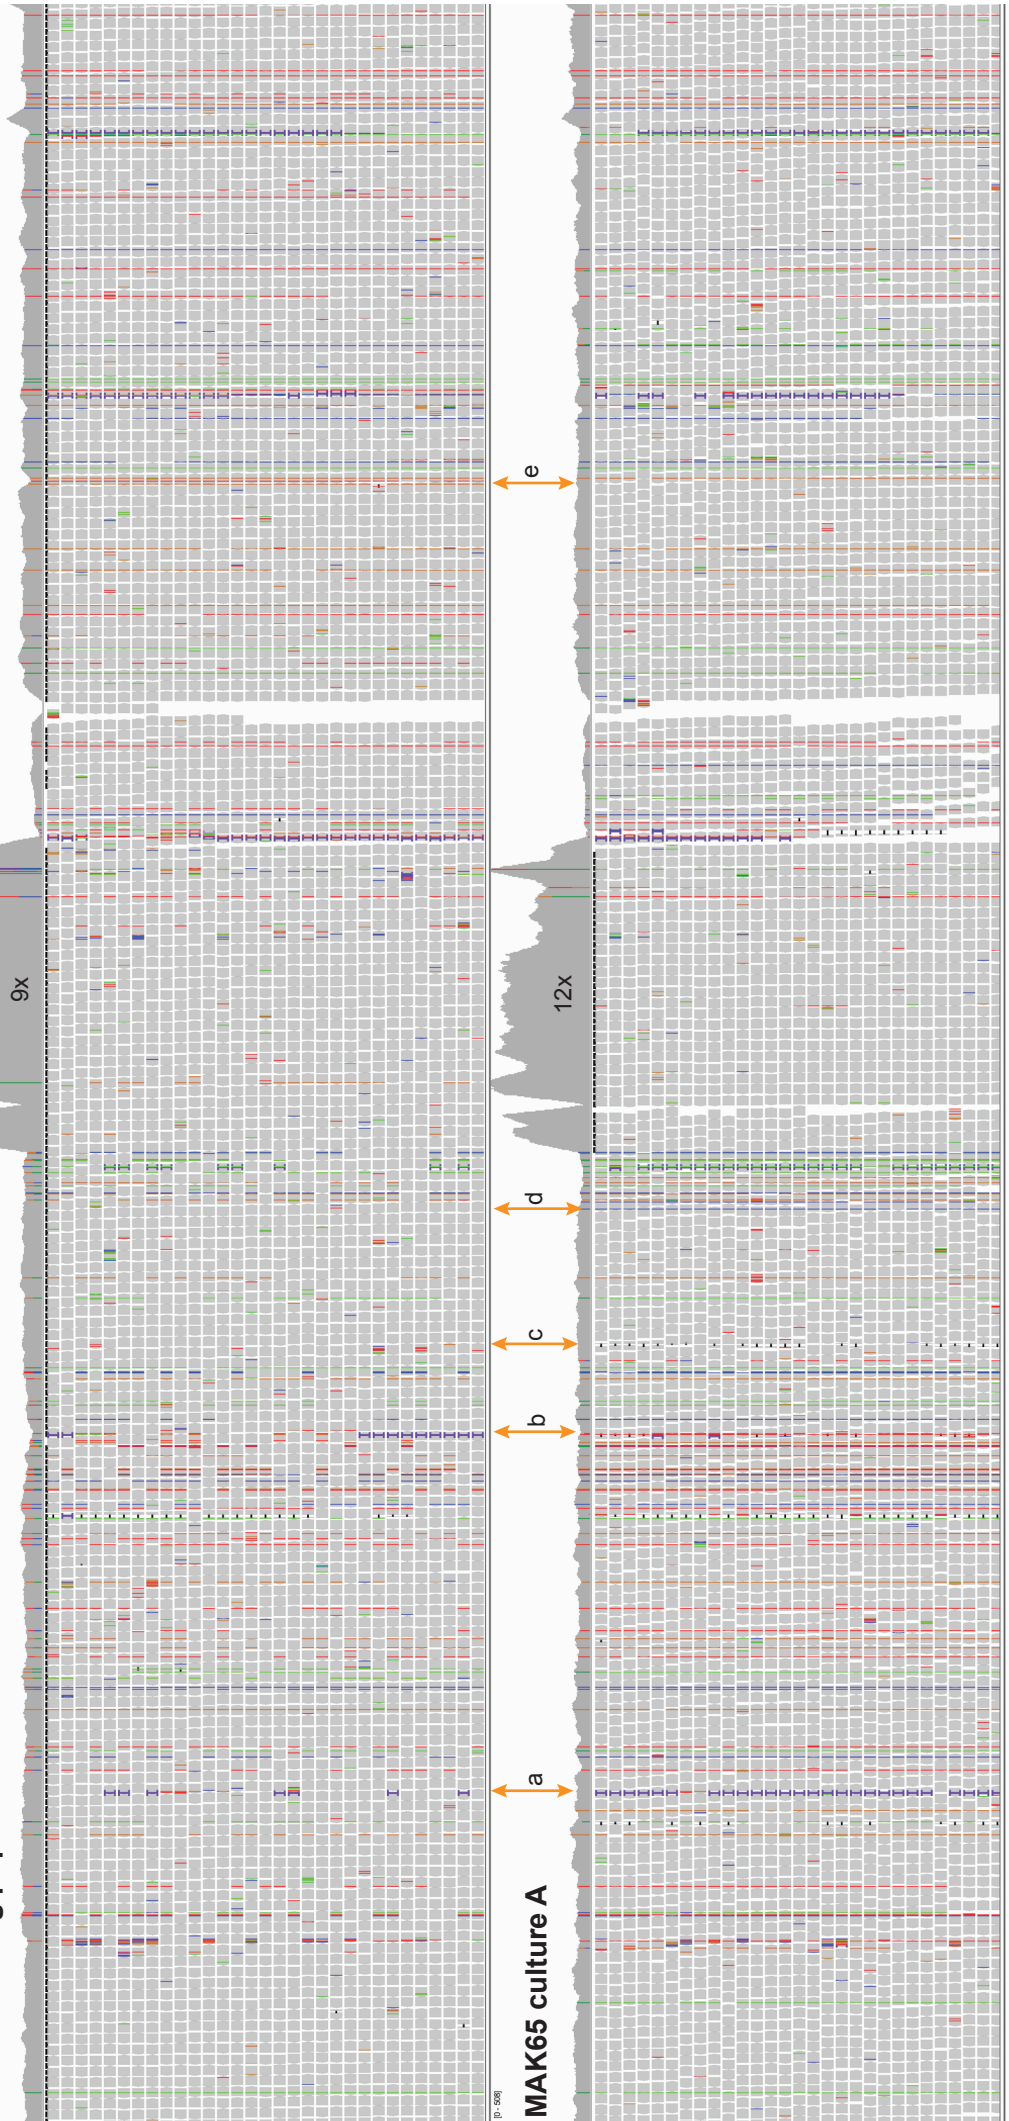

a. insertion haploid in starting population selected in culture

b. insertion haploid in starting population selected against in culture

c. deletion selected in culture

d. SNP selected in culture

e. SNP lost in culture

### KEY

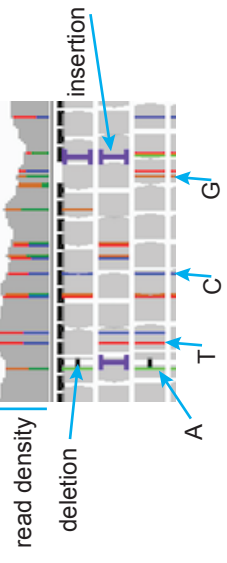

Supplement: pntd.0009738.s004.pdf [file pntd.0009738.s004.pdf]
